# Supplementary material
Source: publisher figshare collection journal article supplement (https://acs.figshare.com/ndownloader/files/5676501)
Supplement: Supplementary file 1 [file 5676501]

## Supporting Information for World Wide Web Edition

Table 1. Comparison of structures calculated with and without calcium and H-bond constraints.

| <u>Model</u> | <u>Coordinate Precision</u>                                    |        |
|--------------|----------------------------------------------------------------|--------|
| Omit Ca      | RMSD to Mean (Backbone Atoms) <sup>a</sup>                     | 0.59 Å |
|              | RMSD to Mean (Heavy Atoms) <sup>a</sup>                        | 1.13 Å |
|              | RMSD to final reported structure (Backbone Atoms) <sup>b</sup> | 0.55 Å |
|              | RMSD to final reported structure (Heavy Atoms) <sup>b</sup>    | 1.20 Å |
| Omit H-bonds | RMSD to Mean (Backbone Atoms) <sup>a</sup>                     | 0.61 Å |
|              | RMSD to Mean (Heavy Atoms) <sup>a</sup>                        | 1.12 Å |
|              | RMSD to final reported structure (Backbone Atoms) <sup>b</sup> | 0.49 Å |
|              | RMSD to final reported structure (Heavy Atoms) <sup>b</sup>    | 1.21 Å |
| Omit Both    | RMSD to Mean (Backbone Atoms) <sup>a</sup>                     | 0.70 Å |
|              | RMSD to Mean (Heavy Atoms) <sup>a</sup>                        | 1.20 Å |
|              | RMSD to final reported structure (Backbone Atoms) <sup>b</sup> | 0.84 Å |
|              | RMSD to final reported structure (Heavy Atoms) <sup>b</sup>    | 1.44 Å |
| Include Both | RMSD to Mean (Backbone Atoms) <sup>a</sup>                     | 0.55 Å |
|              | RMSD to Mean (Heavy Atoms) <sup>a</sup>                        | 1.01 Å |

<sup>a</sup> residues 215-249.<sup>b</sup> residues 215-247.

2

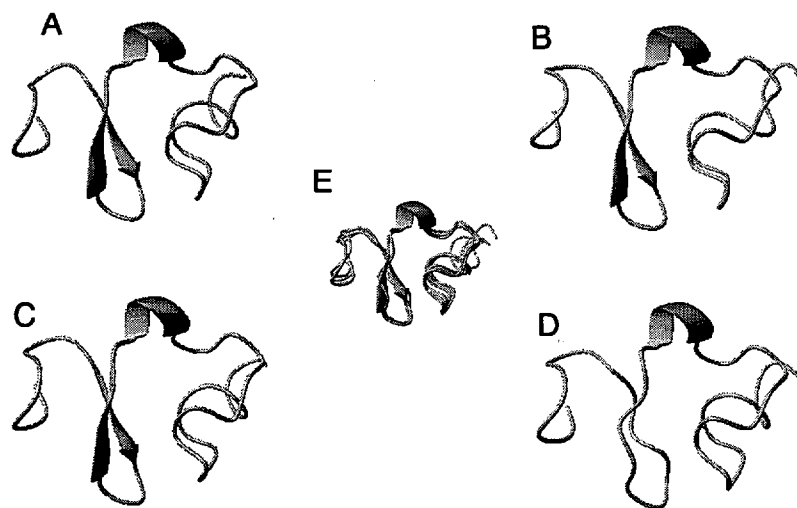

Figure 1. Ribbon representations of minimized mean structures of LR6\* calculated when different sets of distance constraints are omitted from the calculations. A. Model calculated as reported in the text. B. Model calculated omitting explicit H-bond constraints. C. Model calculated without a calcium ion or constraints to specify the octahedral calcium binding-site geometry. D. Model calculated when H-bond and calcium coordination constraints are both omitted from the calculations. E. Best-fit superposition of models A-D.
